# Supplementary material
Source: PubMed Central journal article supplement (PMC6956523)
Supplement: supp_RA119.011341_156255_1_supp_427749_q0lggh.pdf [file supp_RA119.011341_156255_1_supp_427749_q0lggh.pdf]

## **SUPPORTING INFORMATION – FIGURE LEGENDS**

**Figure S1. The silencing of *NDRG1* in (A) DU145 cells or (B) Huh7 cells using a second *NDRG1* siRNA (*NDRG1* II) markedly decreases *NDRG1* expression and up-regulates c-Met expression and phosphorylation (Y1003, Y1234/5, Y1349) relative to the non-targeting, negative control siRNA (siControl).** DU145 or Huh7 cells were incubated with Opti-MEM media containing the siControl or si*NDRG1* II as per the *Experimental Procedures*. The cells were then incubated in normal media alone without hepatocyte growth factor (HGF (-)) or media containing HGF (50 ng/mL; HGF (+)) for 15 min/37 °C. Results are from a representative experiment. **(C-F) Both Dp44mT and DpC down-regulate total c-Met total protein levels in 4 additional tumor cell-types, including: (C) SCC25 oral squamous cell carcinoma; (D) Hep3B hepatoma; (E) PANC-1 pancreatic cancer; and (F) MDA-MB-231 breast cancer cells.** These cells were incubated with Control medium or medium containing Bp2mT (5 µM; negative control), DFO (100 µM), Dp44mT (5 µM), or DpC (5 µM) for 24 h/37 °C. Results are from typical experiments.

**Figure S2. The thiosemicarbazones, Dp44mT and DpC, markedly decrease the phosphorylation at Y307 of the downstream c-Met effector Gab1.** (A, B) DU145 and (C, D) Huh7 cells were incubated with Control medium, or medium containing Bp2mT (5 µM; negative control), DFO (100 µM), Dp44mT (5 µM), or DpC (5 µM), for 24 h/37 °C. These cells were then incubated in media alone without HGF (HGF-) or media containing HGF (50 ng/mL; HGF +) for 15 min/37 °C. Densitometric analyses of western blots for (B) DU145 and (D) Huh7 cells are mean ± SEM ( $n = 3$ ) with the results for Gab1 and p-Gab1 (Y307) normalized to the protein-loading control, β-actin. The p-Gab1 (Y307) levels are also presented as a ratio of total Gab1 protein levels. \* $p < 0.05$ , \*\*\* $p < 0.001$  relative to the respective Control. # $p < 0.05$ , ## $p < 0.01$  relative to the HGF (-) treated cells.

**Figure S3. (A, B) Binding to cellular iron is required for Dp44mT and DpC to down-regulate c-Met protein in DU145 cells.** DU145 cells were incubated with Control medium or this medium containing either Bp2mT (5 µM; negative control), DFO (100 µM), Dp44mT (5 µM), or DpC (5 µM), for 24 h/37 °C. Cells were also incubated with Fe(III) (as FeCl<sub>3</sub>; [Fe] = 2.5 or 100 µM), Bp2mT (5 µM) together with FeCl<sub>3</sub> (2.5 µM), or the Fe complexes of the chelators, namely DFO-Fe (1:1), Dp44mT-Fe (1:2) and DpC-Fe (1:2) for 24 h/37 °C. Densitometric analyses of western blots are mean ± SEM ( $n = 3$ ) normalized to the protein-loading control, β-actin. \* $p < 0.05$ , \*\* $p < 0.01$ , \*\*\* $p < 0.001$  relative to the respective Control. # $p < 0.05$ , ## $p < 0.01$  relative to the respective ligands. **(C-F) The anti-oxidant, N-acetylcysteine (NAC), has no effect on c-Met down-regulation by Dp44mT and DpC.** (C) DU145 and (E) Huh7 cells were incubated with Control medium, or this medium containing Bp2mT (5 µM; negative control), DFO (100 µM), Dp44mT (5 µM), or DpC (5 µM) alone, or in combination with NAC (5 mM) for 24 h/37 °C. Densitometric analyses of western blots for (D) DU145 and (F) Huh7 cells are mean ± SEM ( $n = 3$ ) normalized to the protein-loading control, β-actin. \* $p < 0.05$ , \*\* $p < 0.01$ , \*\*\* $p < 0.001$  relative to the Control.

**Figure S4. The silencing of *MIG6* in (A, B) DU145 cells or (C, D) Huh7 cells using a second *MIG6* siRNA (*MIG6* II) markedly decreases *MIG6* expression and up-regulates c-Met expression and its phosphorylation at Y1349.** DU145 or Huh7 cells were incubated with Opti-MEM media containing non-targeting, negative control siRNA (siControl) or siRNA specific for *MIG6* (si*MIG6*II; E-H) in the absence of HGF (see *Experimental Procedures*). Western analysis was then performed. Densitometric analyses of western blots are from a typical experiment and are normalized to the protein-loading control, β-actin. Results are from a typical experiment.

**Figure S5. Thiosemicarbazones have no appreciable effect on Gab1 and p-Gab1 (Y307) levels after *NDRG1* or *MIG6* silencing.** DU145 or Huh7 cells were incubated with Opti-MEM media containing non-targeting, negative control siRNA (siControl) or siRNA specific for *NDRG1* (si*NDRG1*; A-D) or *MIG6* (si*MIG6*; E-H) in the absence of HGF. The cells were then incubated with

Control medium, or this medium containing Dp44mT or DpC at 5  $\mu$ M for 24 h/37  $^{\circ}$ C. Western analysis was then performed. Densitometric analyses for NDRG1 and MIG6 are mean  $\pm$  SEM ( $n = 3$ ) normalized to the protein-loading control,  $\beta$ -actin. \* $p < 0.05$ , \*\* $p < 0.01$ , \*\*\* $p < 0.001$  relative to the respective Control. # $p < 0.05$ , ## $p < 0.01$ , ### $p < 0.001$  relative to siControl samples. For Gab1 and pGab1 (Y307) the densitometry is from typical experiments.

**Figure S6. Dp44mT and DpC do not significantly modulate HSP90 protein levels.** (A, B) DU145 and (C, D) Huh7 cells were incubated with Control medium or this medium containing either: Bp2mT (5  $\mu$ M; negative control), DFO (100  $\mu$ M), Dp44mT (5  $\mu$ M), or DpC (5  $\mu$ M) for 24 h/37  $^{\circ}$ C. Densitometric analysis of western blots is shown as the mean  $\pm$  SEM ( $n = 3$ ) normalized to  $\beta$ -actin protein (A-D).

**Figure S7. Incubation of Huh7 cells with lysosomotropic agents does not prevent down-regulation of c-Met expression mediated by Dp44mT and DpC.** Huh7 cells were incubated with Control medium or this medium containing either NH<sub>4</sub>Cl (15 mM), methylamine (MA; 15 mM), chloroquine (CLQ; 50  $\mu$ M), Dp44mT (5  $\mu$ M), or DpC (5  $\mu$ M) alone, or in combination for 24 h/37  $^{\circ}$ C, and either: (A) confocal immunofluorescence microscopy, or (B) Western analysis was performed to determine c-Met protein levels. (A) All images were taken with a 63x objective and at the same acquisition settings using Zeiss Zen Blue software. Scale bar represents 10  $\mu$ m. (C) Densitometric analyses of western blots are mean  $\pm$  SEM ( $n = 3$ ) normalized to a protein-loading control,  $\beta$ -actin. \* $p < 0.05$ , \*\* $p < 0.01$ , \*\*\* $p < 0.001$  relative to the Control.

**Figure S8. Dp44mT does not increase c-Met CTF levels when incubated together with the lysosomotropic agents in DU145 cells.** (A) DU145 cells were incubated with Control medium or this medium containing either: NH<sub>4</sub>Cl (15 mM), methylamine (MA; 15 mM), chloroquine (CLQ; 50  $\mu$ M), Dp44mT (5  $\mu$ M), or DpC (5  $\mu$ M) alone, or in combination for 24 h/37  $^{\circ}$ C. Results of western blots are from a representative experiment.

**Figure S9. Proteasome inhibition prevents degradation of c-Met ICD, and Dp44mT decreases the levels of c-Met ICD in Huh7 cells.** (A) Huh7 cells were incubated with Control medium or this medium containing either: Dp44mT (5  $\mu$ M), MG132 (2.5 or 5  $\mu$ M), EDTA (1 mM) alone, or these agents in combination for 24 h/37  $^{\circ}$ C. Three images of blots developed at different exposure times (Ai-Aiii) are shown for optimal presentation of different c-Met isoforms, namely c-Met precursor, mature form, c-Met C-terminal fragment (CTF) and c-Met intracellular domain (ICD). Densitometric analyses of western analysis for: (B) c-Met precursor and mature form and (C) 50-kDa c-Met ICD. Results are mean  $\pm$  SEM ( $n = 3$ ) normalized to the protein-loading control,  $\beta$ -actin. \* $p < 0.05$  and \*\* $p < 0.01$  relative to the Control. † $p < 0.05$ , relative to cells incubated with Dp44mT.

**Figure S10. The combined mechanisms of thiosemicarbazones that down-regulate c-Met are demonstrated in multiple cancer cell-types** (A) PANC-1 pancreatic cancer, SCC25 oral squamous cell carcinoma, MDA-MB-231 breast cancer and Hep3B cells were compared to DU145 and Huh7 cells as internal controls and incubated with control medium or this medium containing Dp44mT (5  $\mu$ M) in the presence or absence of the lysosomotropic agent, CLQ (50  $\mu$ M/24 h/37 $^{\circ}$ C), to inhibit lysosomal c-Met degradation. (B) The cell-types in (A) were incubated with control medium or this medium containing Dp44mT in the presence and absence of the broad metalloprotease inhibitor, EDTA (1 mM), for 8 h/37 $^{\circ}$ C. (C) The effect of Dp44mT (5  $\mu$ M) on *NDRG1* and *MET* mRNA levels was assessed in all cell-types described in (A) after incubation with Dp44mT or the Control for 24 h/37 $^{\circ}$ C. Results from (A, B) western blots and (C) RT-PCR were compared relative to  $\beta$ -actin protein and mRNA, respectively, and are from a typical experiment.

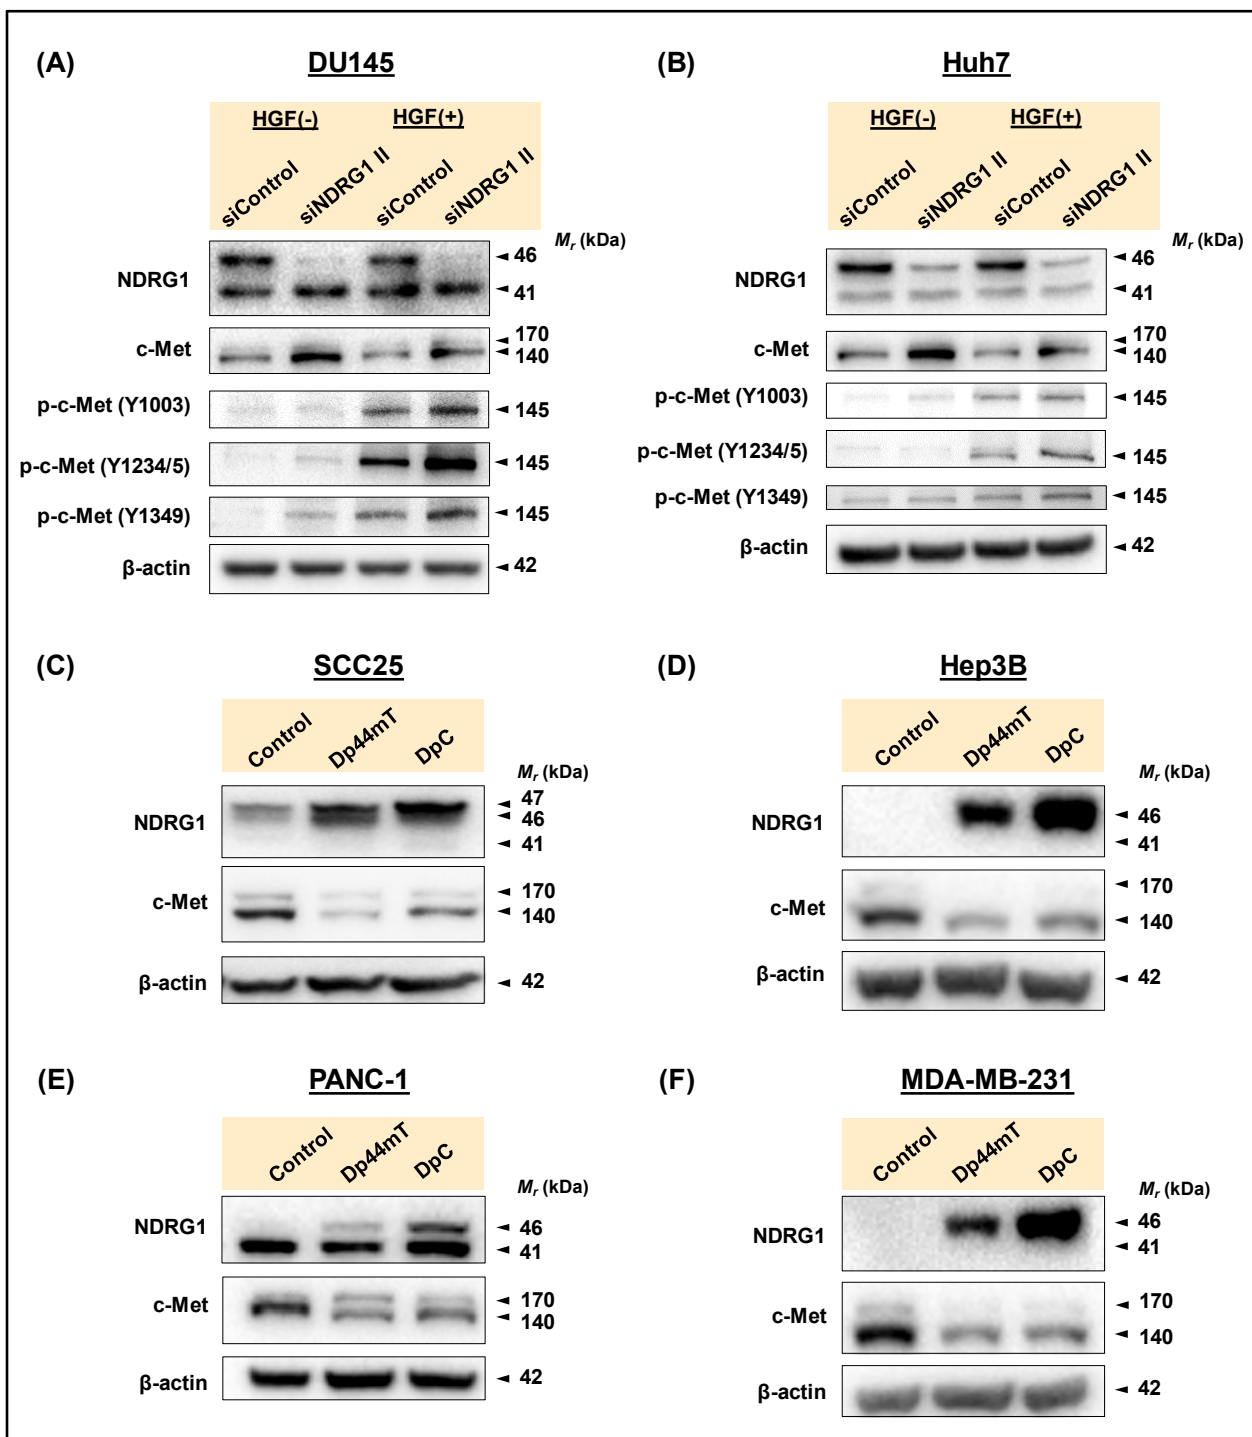

Figure S1

**(A)****DU145**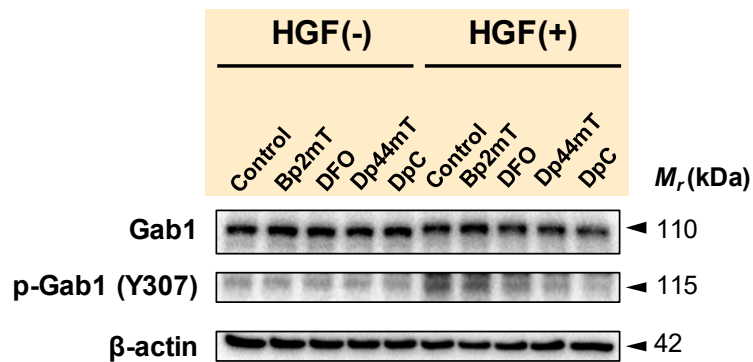**(B)**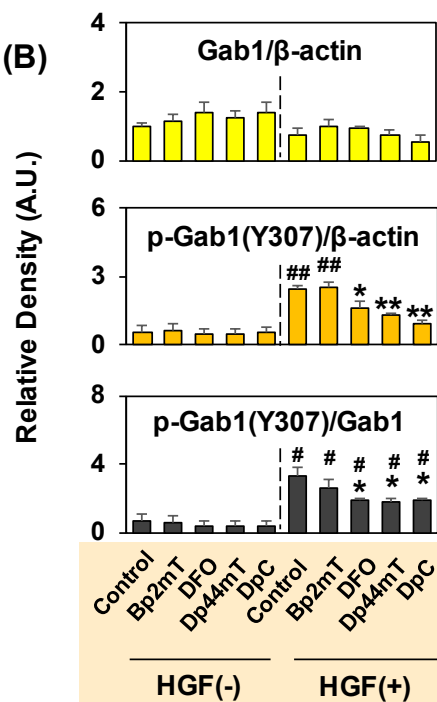**(C)****Huh7**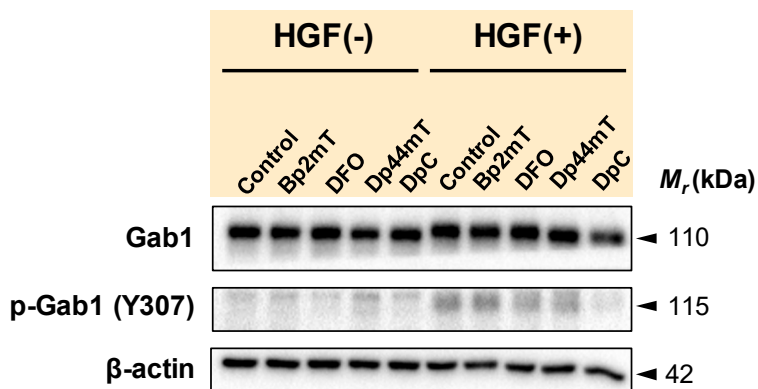**(D)**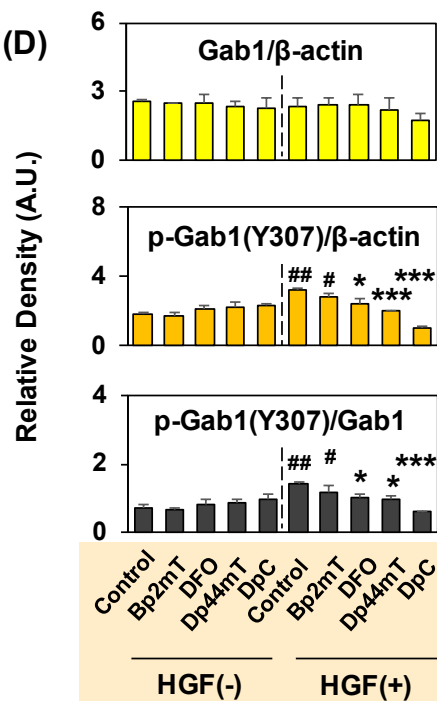**Figure S2**

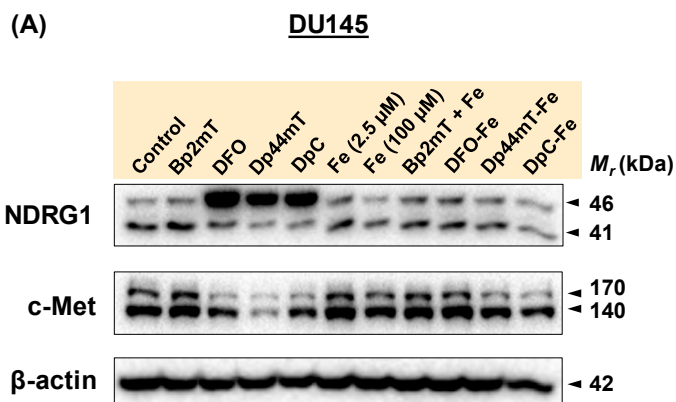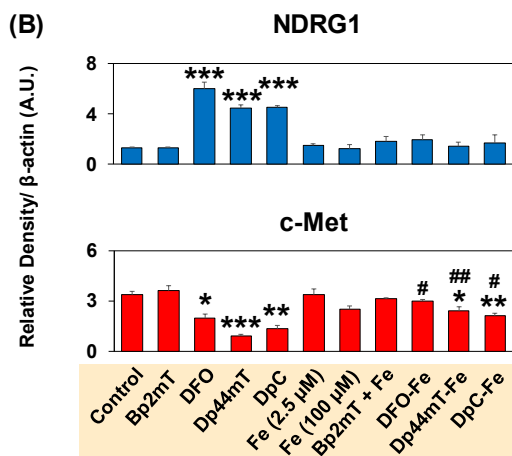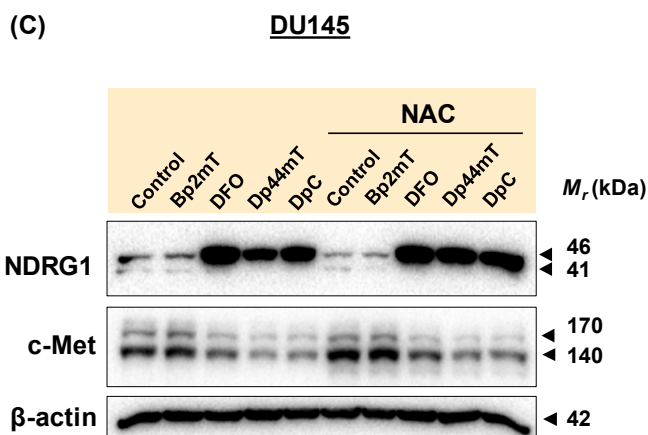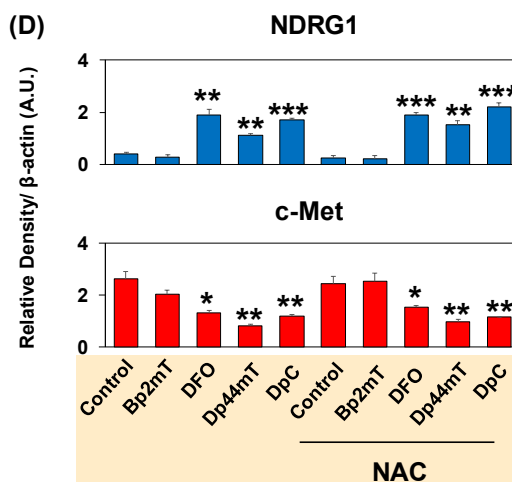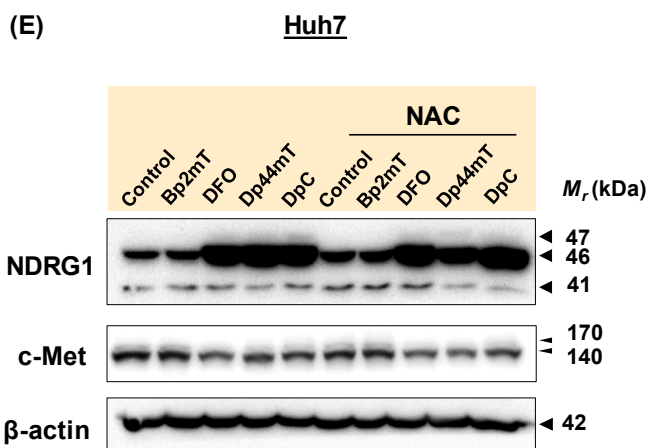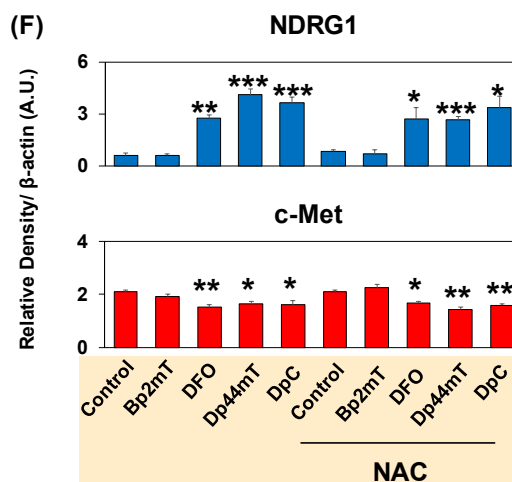

**Figure S3**

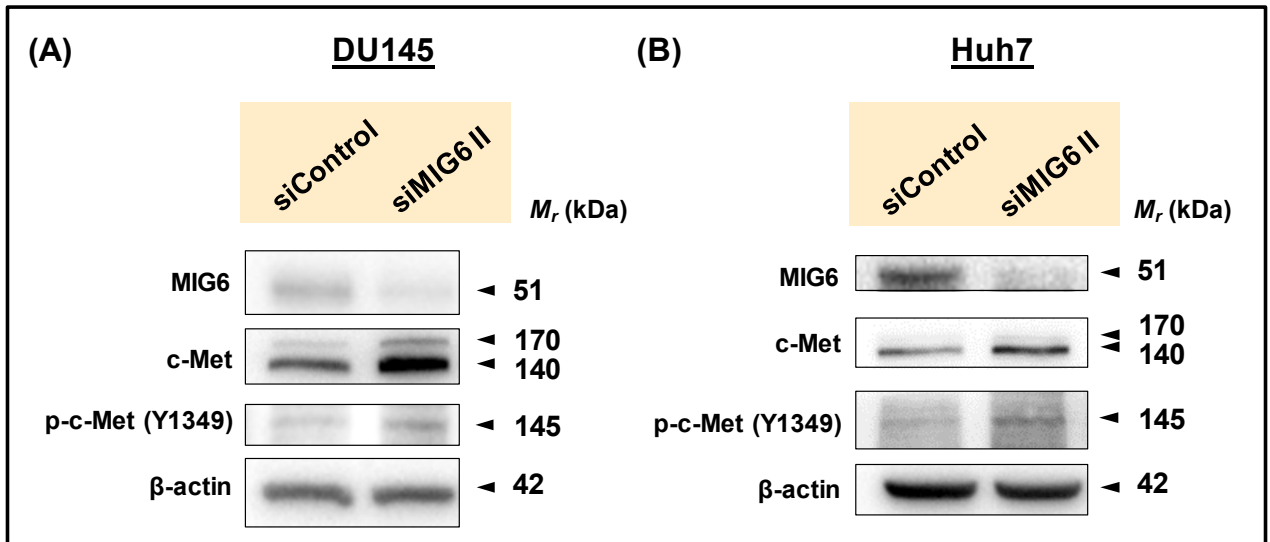

Figure S4

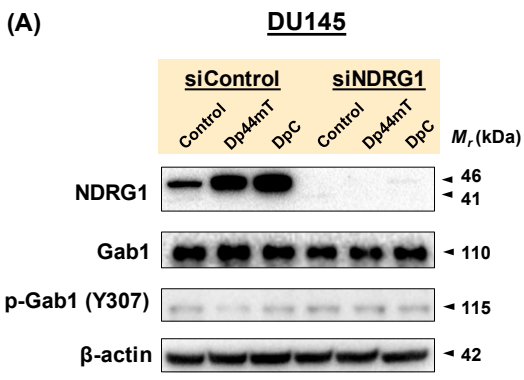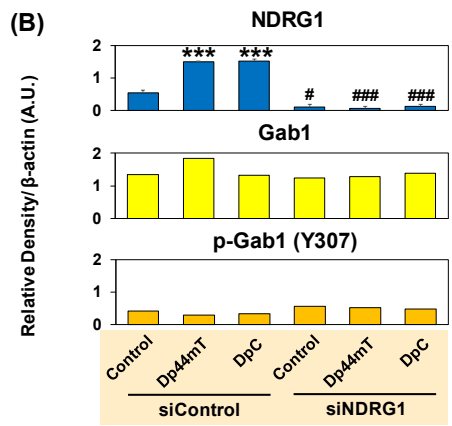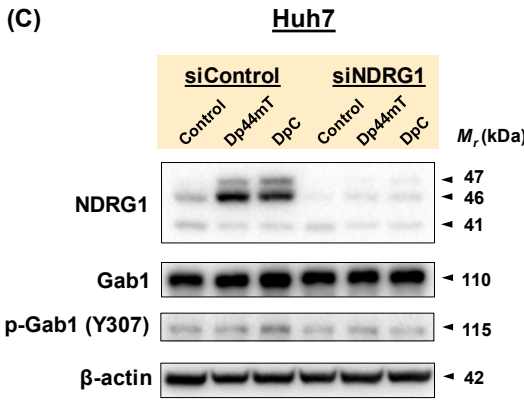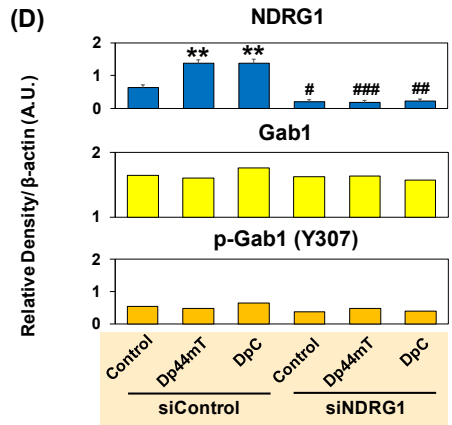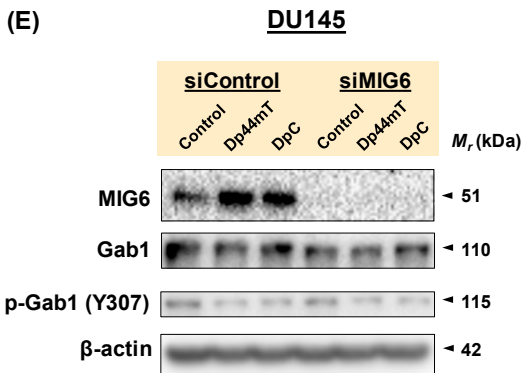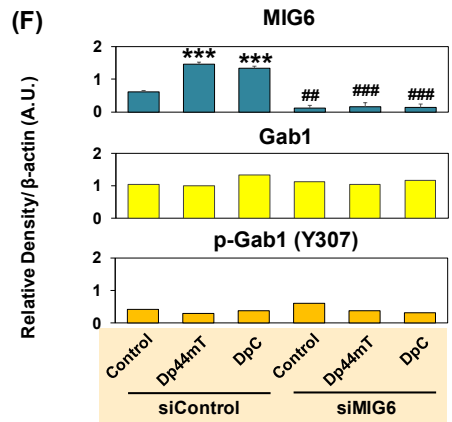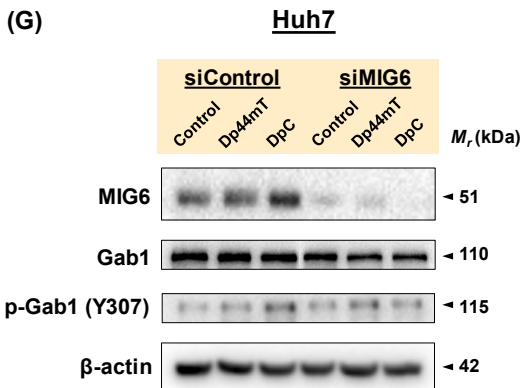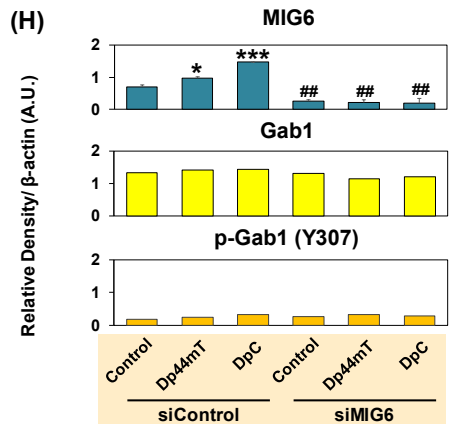

**Figure S5**

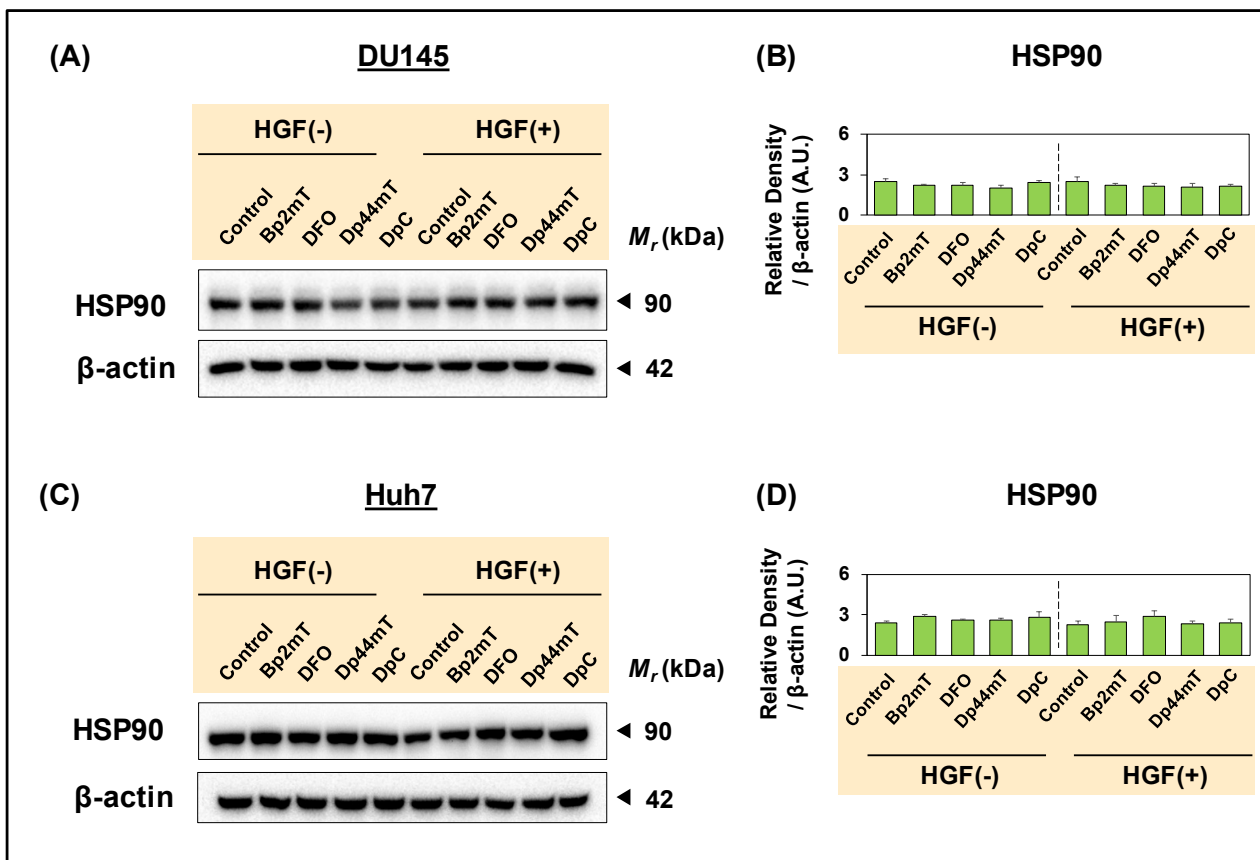

**Figure S6**



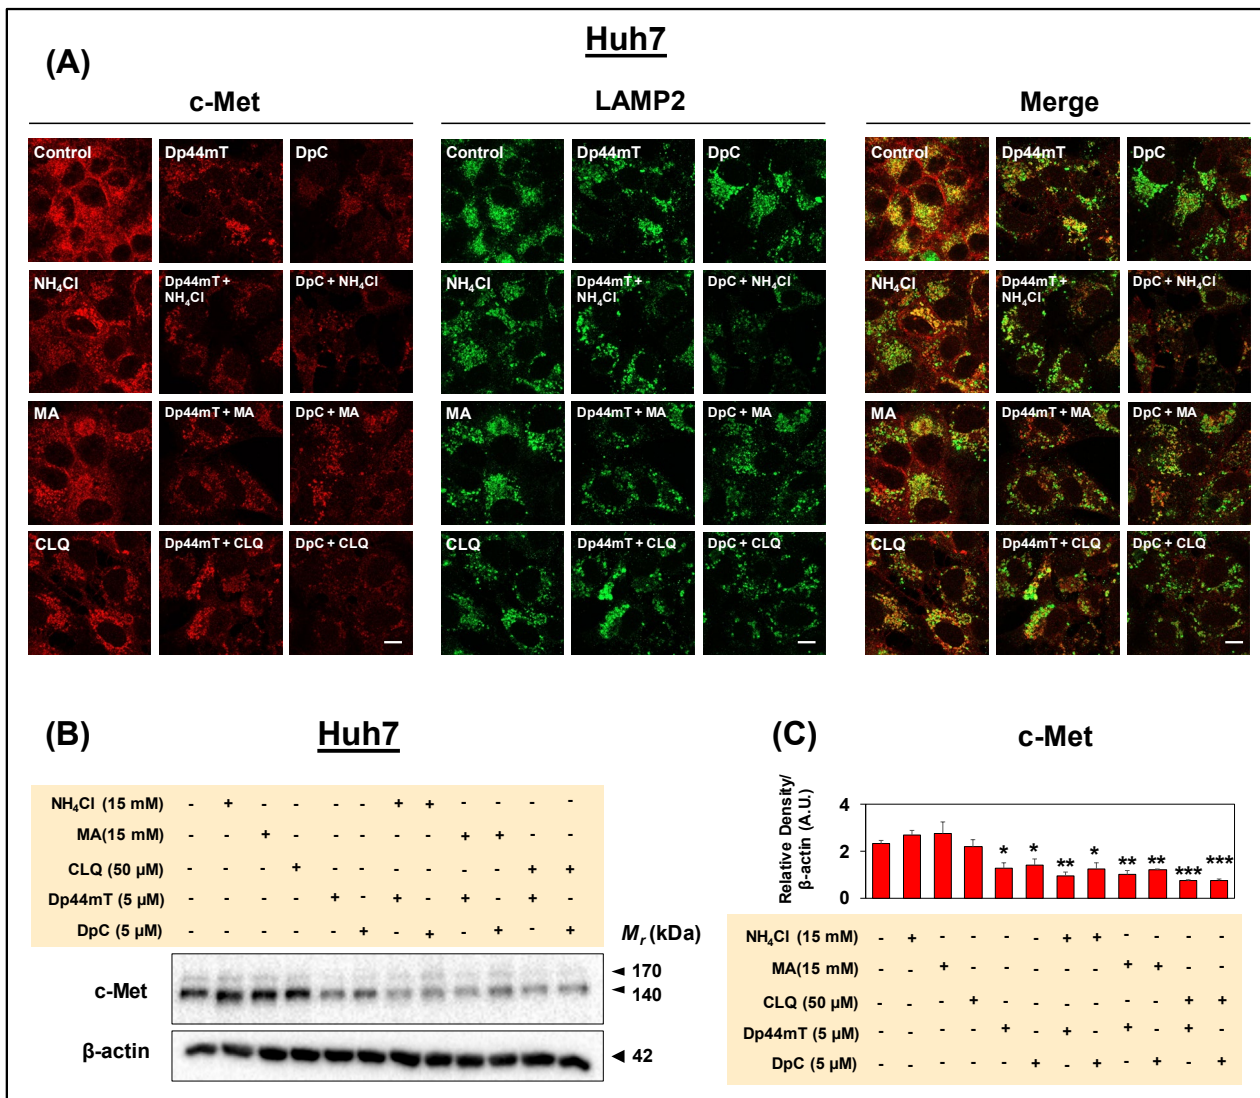

**Figure S7**

## DU145

|                                 |   |   |   |   |   |   |   |   |   |   |   |   |                            |
|---------------------------------|---|---|---|---|---|---|---|---|---|---|---|---|----------------------------|
| <b>NH<sub>4</sub>Cl (15 mM)</b> | - | - | - | + | - | - | - | + | - | - | - | + | <i>M<sub>r</sub></i> (kDa) |
| <b>MA(15 mM)</b>                | - | - | + | - | - | - | + | - | - | - | + | - |                            |
| <b>CLQ (50 μM)</b>              | - | + | - | - | - | + | - | - | - | + | - | - |                            |
| <b>Dp44mT (5 μM)</b>            | - | - | - | - | + | + | + | + | - | - | - | - |                            |
| <b>DpC (5 μM)</b>               | - | - | - | - | - | - | - | - | + | + | + | + |                            |

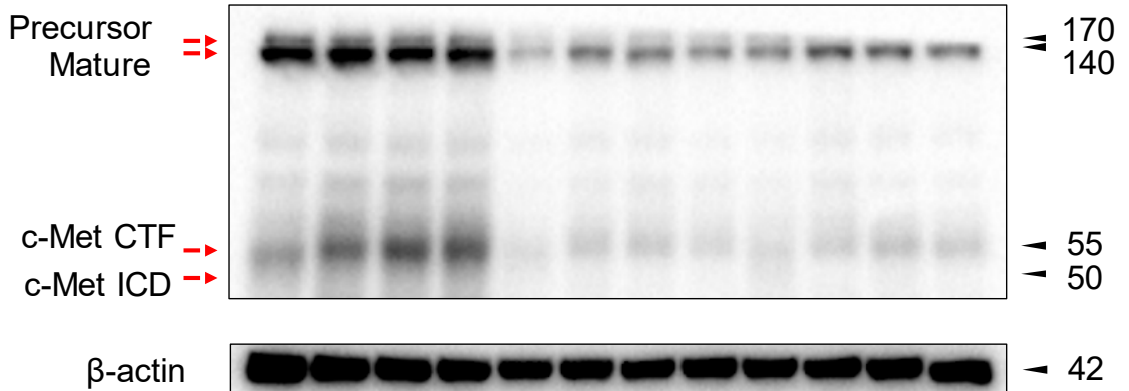

**Figure S8**

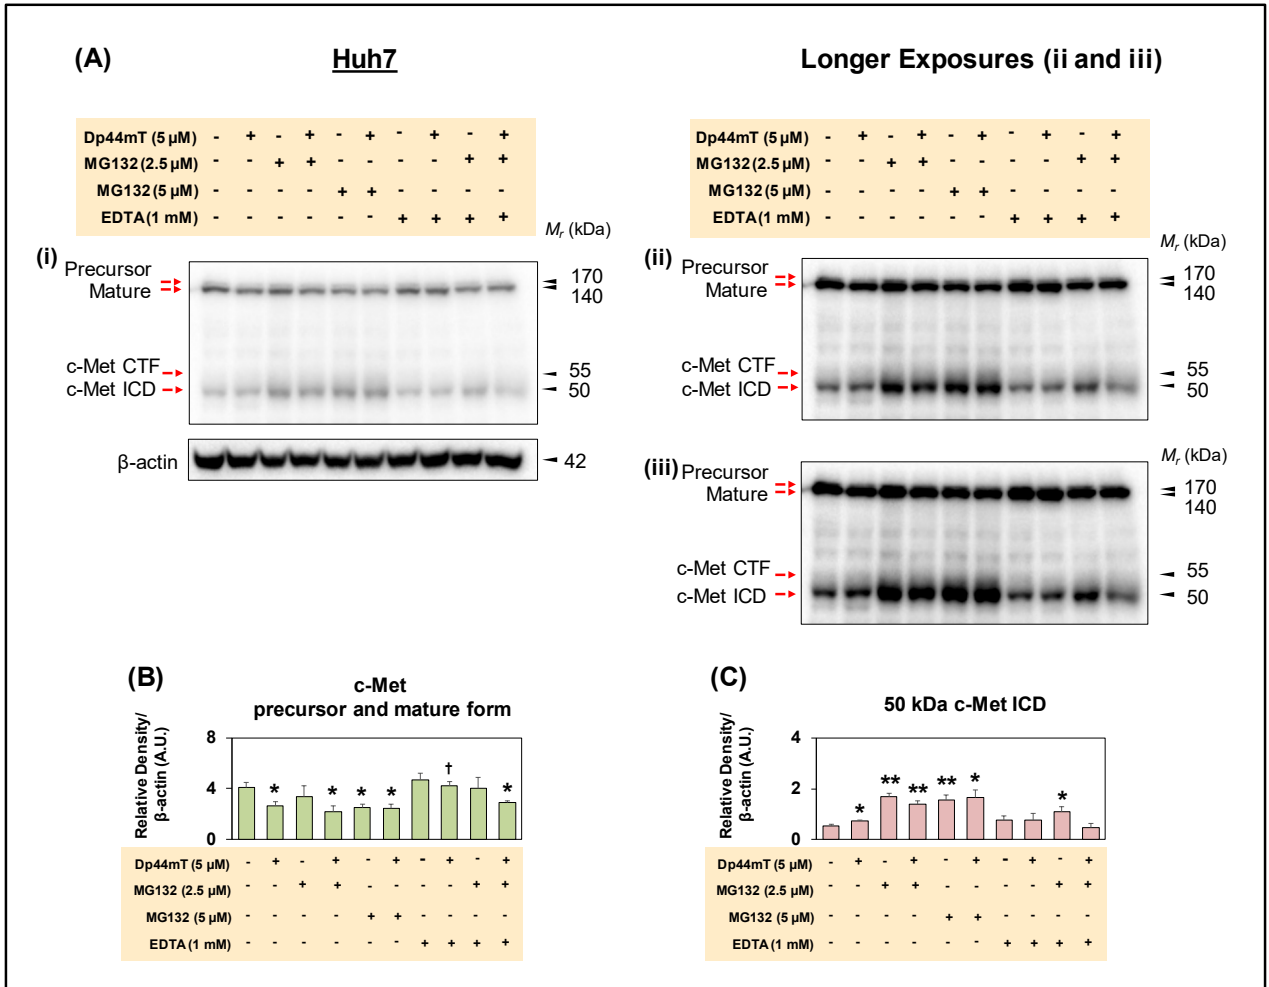

**Figure S9**

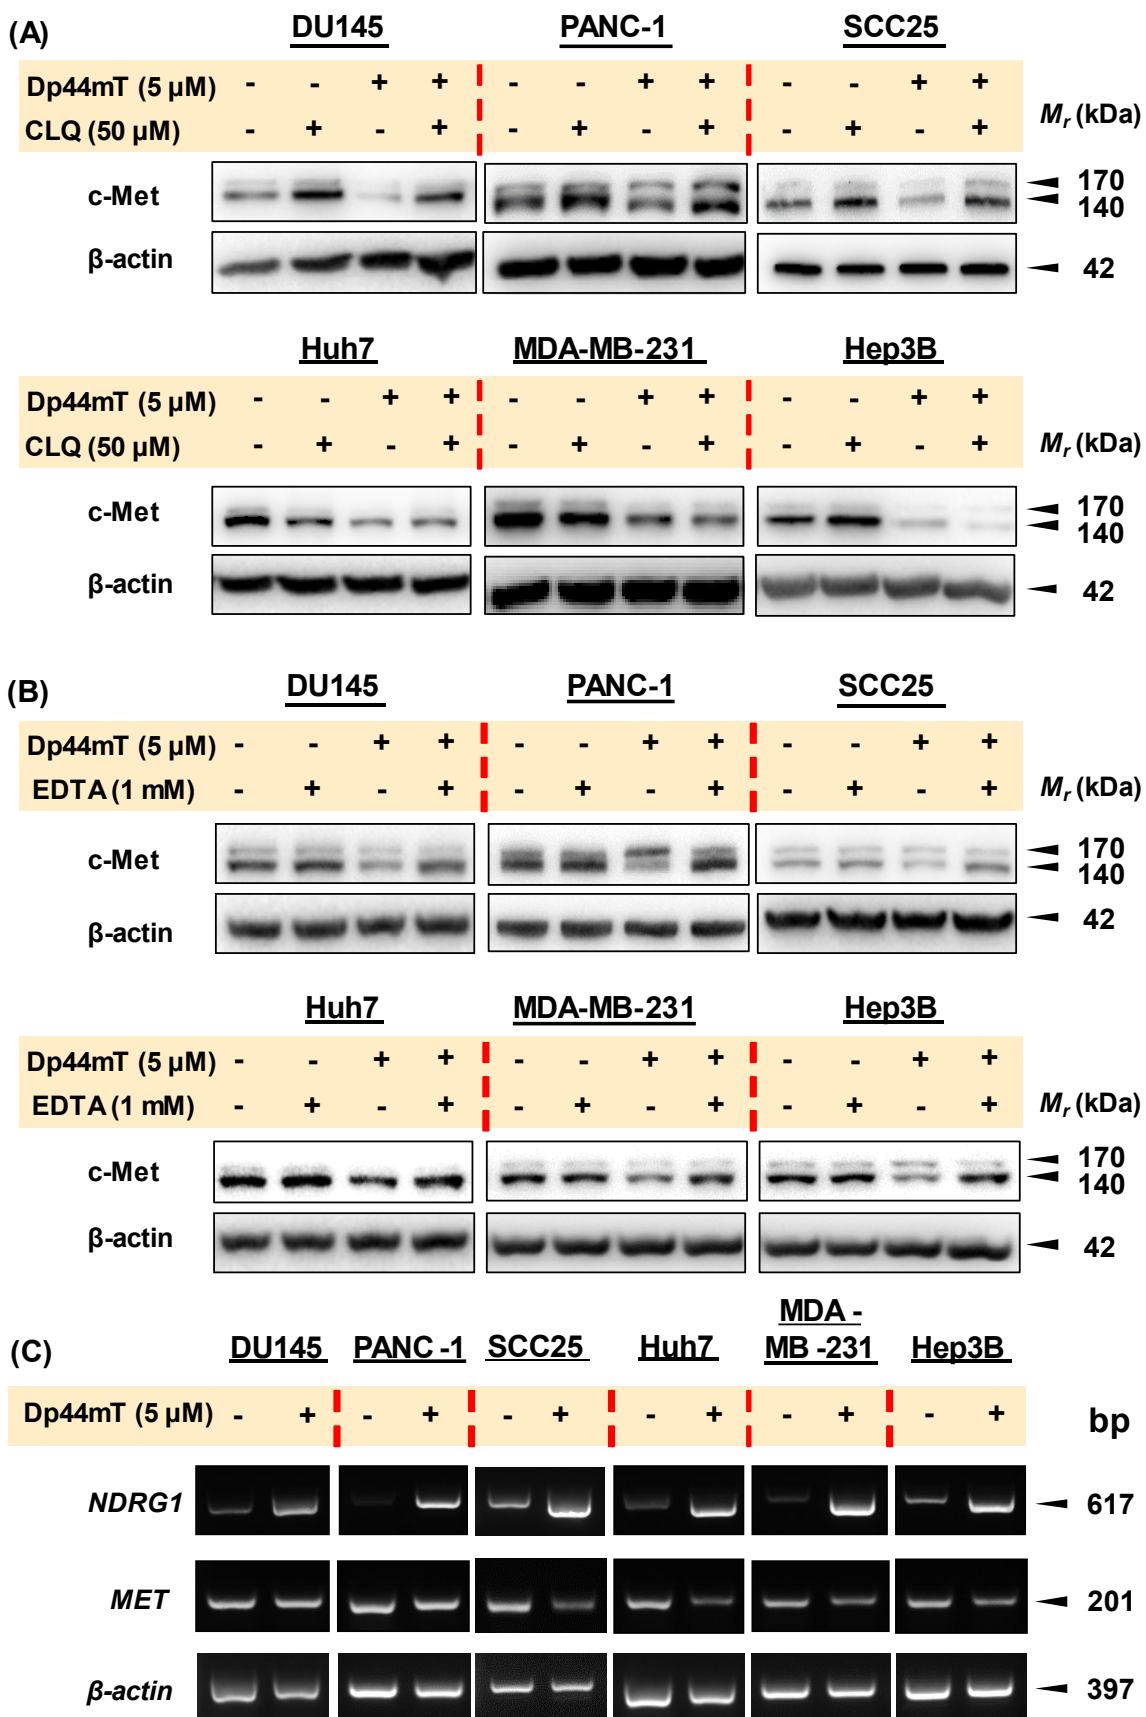

Figure S10
